# Supplementary material
Source: PubMed Central journal article supplement (PMC4878325)
Supplement: supp_2015-0116_Supplemental_Figures.pdf [file supp_2015-0116_Supplemental_Figures.pdf]

## Supplemental Figures – Yip et al.

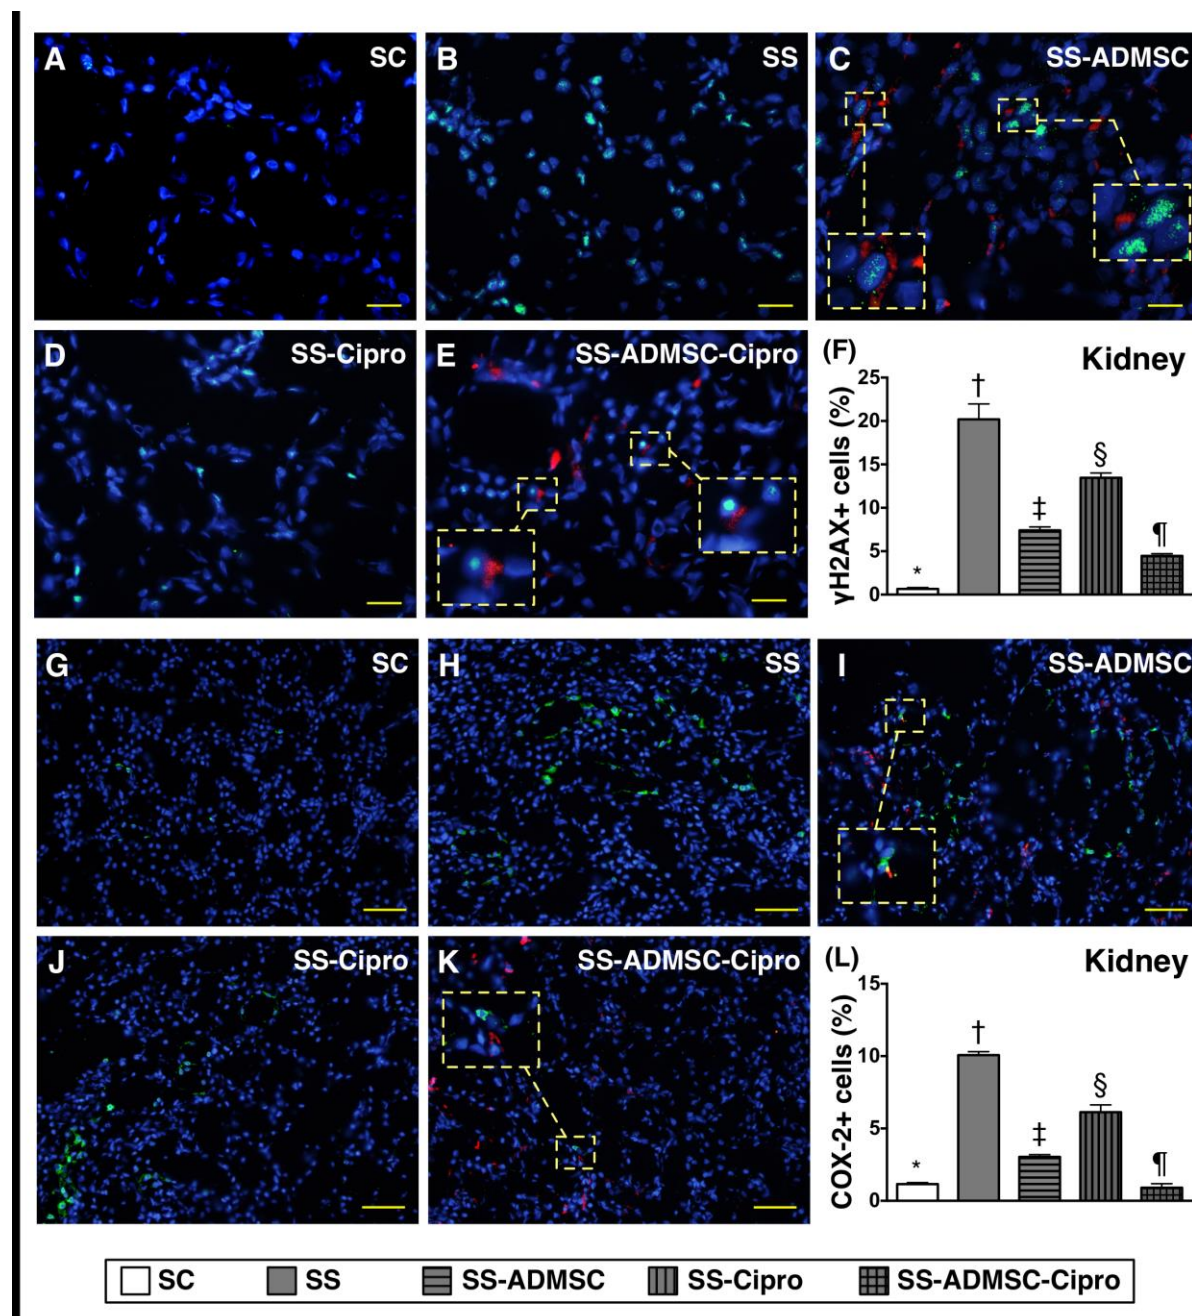

**Figure S1. Immunofluorescent (IF) microscopic findings of DNA damaged and inflammatory cells in kidney parenchyma by day 5 after sepsis induction**

**A to E)** IF microscopic (400x) finding for identification of  $\gamma$ -H2AX+ cells (green color), the red color indicated the transfused ADMSC that already mobilized to kidney parenchyma. The  $\gamma$ -H2AX+ cells (green color) and implanted ADMSCs (red color) in smaller dotted line square were magnified to larger dotted line square in **(C)** and **(E)**. **F)** \* vs. other groups with different symbols (\*, †, ‡, §, ¶),  $p < 0.0001$ . The scale bars in right lower corner represent 20  $\mu$ m. **G to K)** IF microscopic (200x) finding for identification of Cox-2+ cells (green color), the red color indicated the transfused ADMSC that already mobilized to kidney parenchyma. The COX-2+ cells (green color) and implanted ADMSCs (red color) in smaller dotted line square were magnified to larger dotted line square in **(I)** and **(K)**. **L)** \* vs. other groups with different symbols (\*, †, ‡, §, ¶),  $p < 0.0001$ . The scale bars in right lower corner represent 50  $\mu$ m. All statistical analyses were performed by one-way ANOVA, followed by Bonferroni multiple comparison post hoc test. Symbols (\*, †, ‡, §, ¶) indicate significance (at 0.05 level). SC = sham control; SS = sepsis syndrome; ADMSC = adipose-derived mesenchymal stem cell; Cipro = ciprofloxacin.

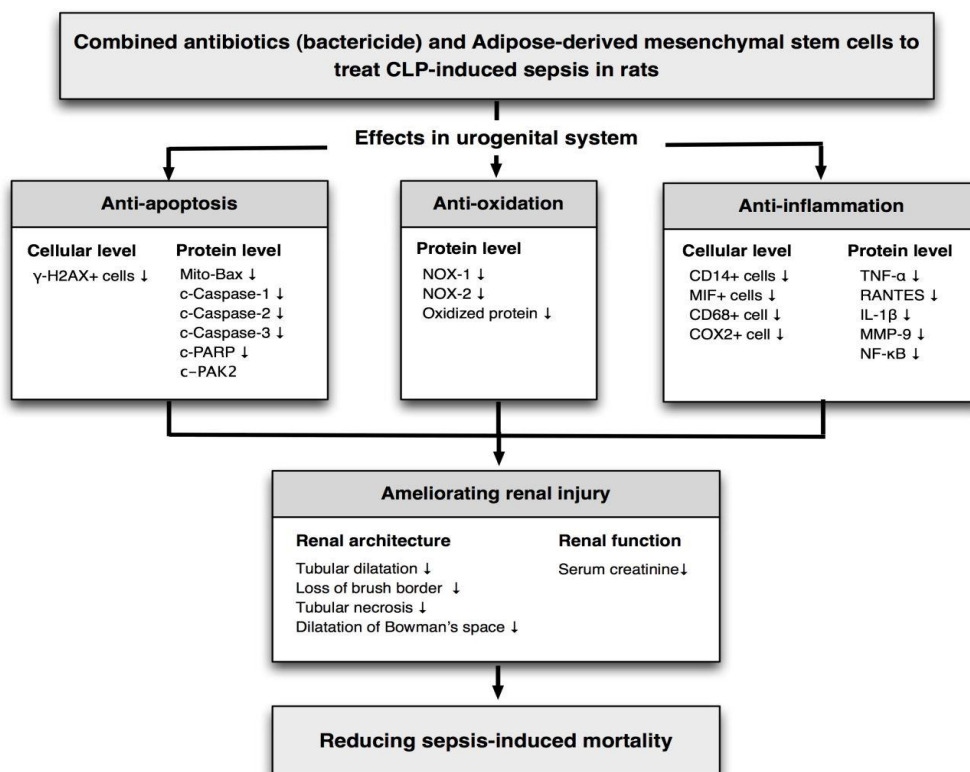

**Figure S2. Proposed mechanisms underlying the positive therapeutic effects of combined ADMSC and antibiotic therapy on acute sepsis syndrome**

CLI = cecal-ligation puncture; c-PARP = cleaved poly (ADP-ribose) polymerase (PARP); PAK2 = p21

protein (Cdc42/Rac)-activated kinase 2; NOX = NADPH oxidase; MIF = macrophage migratory inhibitor

factor; TNF = tumor necrotic factor; RANTES = regulated on activation, normal T cell expressed and

secreted; IL-1β = interleukin; MMP = matrix metalloproteinase; NF-κB = nuclear factor.
